# Supplementary material
Source: MDPI journal article supplement (https://www.mdpi.com/1999-4907/14/8/1689)
Supplement: s1 [file s1]

# List of supplementary material

## Section 1: Citizen science data collection for bird species

**Table S1**

Bird data collected from public citizen science websites. A total of 311 bird species data were collected, and bird species with occurrence counts less than or equal to 5 were excluded when applying the RF model [1]. The classification of phenological status was based on the method proposed by Zheng et al. [2], which includes the following categories: RB (Resident birds), SMB (Summer migratory birds), WMB (Winter migratory birds), and TB (Transit birds). IUCN: International Union for Conservation of Nature, divided into five levels, LC(Least Concern); NT(Near Threatened); VU(Vulnerable); EN(Endangered); CR(Critically Endangered).

| Bird species                     | Number of occurrences | IUCN category | Phenological status |
|----------------------------------|-----------------------|---------------|---------------------|
| <i>Abroscopus albogularis</i>    | 19                    | LC            | RB                  |
| <i>Accipiter gentilis</i>        | 4                     | LC            | WMB                 |
| <i>Accipiter gularis</i>         | 8                     | LC            | WMB                 |
| <i>Accipiter nisus</i>           | 12                    | LC            | WMB                 |
| <i>Accipiter soloensis</i>       | 18                    | LC            | RB                  |
| <i>Accipiter trivirgatus</i>     | 48                    | LC            | RB                  |
| <i>Acridotheres cristatellus</i> | 454                   | LC            | RB                  |
| <i>Acrocephalus bistrigiceps</i> | 6                     | LC            | TB                  |
| <i>Acrocephalus orientalis</i>   | 12                    | LC            | SMB                 |
| <i>Actitis hypoleucos</i>        | 56                    | LC            | WMB                 |
| <i>Aegithalos concinnus</i>      | 81                    | LC            | RB                  |
| <i>Aegithalos glaucogularis</i>  | 58                    | LC            | RB                  |
| <i>Aerodramus brevirostris</i>   | 2                     | LC            | TB                  |
| <i>Aix galericulata</i>          | 70                    | LC            | WMB                 |
| <i>Alauda arvensis</i>           | 6                     | LC            | WMB                 |
| <i>Alauda gulgula</i>            | 14                    | LC            | RB                  |
| <i>Alcedo atthis</i>             | 154                   | LC            | RB                  |
| <i>Amaurornis phoenicurus</i>    | 50                    | LC            | RB                  |
| <i>Anas acuta</i>                | 10                    | LC            | WMB                 |
| <i>Anas platyrhynchos</i>        | 85                    | LC            | WMB                 |
| <i>Anas zonorhyncha</i>          | 205                   | LC            | WMB                 |
| <i>Anser fabalis</i>             | 2                     | LC            | WMB                 |
| <i>Anthus cervinus</i>           | 12                    | LC            | WMB                 |
| <i>Anthus gustavi</i>            | 4                     | LC            | TB                  |
| <i>Anthus hodgsoni</i>           | 221                   | LC            | WMB                 |
| <i>Anthus richardi</i>           | 18                    | LC            | SMB                 |
| <i>Anthus rubescens</i>          | 13                    | LC            | WMB                 |
| <i>Anthus spinoletta</i>         | 3                     | LC            | WMB                 |
| <i>Antigone vipio</i>            | 1                     | LC            | WMB                 |
| <i>Apus nipalensis</i>           | 11                    | LC            | SMB                 |
| <i>Ardea alba</i>                | 74                    | LC            | SMB                 |

|                                 |     |    |     |
|---------------------------------|-----|----|-----|
| <i>Ardea cinerea</i>            | 155 | LC | RB  |
| <i>Ardea intermedia</i>         | 36  | LC | SMB |
| <i>Ardea purpurea</i>           | 7   | LC | SMB |
| <i>Ardeola bacchus</i>          | 82  | LC | SMB |
| <i>Arenaria interpres</i>       | 1   | LC | TB  |
| <i>Arundinax aedon</i>          | 1   | LC | TB  |
| <i>Asio flammeus</i>            | 3   | LC | WMB |
| <i>Asio otus</i>                | 3   | LC | WMB |
| <i>Aythya baeri</i>             | 7   | CR | WMB |
| <i>Aythya ferina</i>            | 18  | VU | WMB |
| <i>Aythya fuligula</i>          | 104 | LC | WMB |
| <i>Aythya marila</i>            | 3   | LC | WMB |
| <i>Bombycilla garrulus</i>      | 17  | LC | WMB |
| <i>Bombycilla japonica</i>      | 15  | NT | WMB |
| <i>Botaurus stellaris</i>       | 5   | LC | WMB |
| <i>Bubulcus coromandus</i>      | 26  | /  | SMB |
| <i>Bucephala clangula</i>       | 1   | LC | WMB |
| <i>Butastur indicus</i>         | 9   | LC | TB  |
| <i>Buteo japonicus</i>          | 39  | LC | WMB |
| <i>Butorides striata</i>        | 23  | LC | RB  |
| <i>Calcarius lapponicus</i>     | 1   | LC | WMB |
| <i>Calidris acuminata</i>       | 7   | LC | TB  |
| <i>Calidris alba</i>            | 4   | LC | TB  |
| <i>Calidris alpina</i>          | 7   | LC | WMB |
| <i>Calidris canutus</i>         | 2   | NT | TB  |
| <i>Calidris falcinellus</i>     | 2   | LC | TB  |
| <i>Calidris minuta</i>          | 1   | LC | TB  |
| <i>Calidris pugnax</i>          | 1   | LC | TB  |
| <i>Calidris pygmaea</i>         | 3   | CR | WMB |
| <i>Calidris ruficollis</i>      | 10  | NT | TB  |
| <i>Calidris subminuta</i>       | 3   | LC | TB  |
| <i>Calidris temminckii</i>      | 3   | LC | WMB |
| <i>Calidris tenuirostris</i>    | 3   | EN | TB  |
| <i>Calliope calliope</i>        | 8   | LC | TB  |
| <i>Caprimulgus jotaka</i>       | 23  | LC | SMB |
| <i>Cecropis daurica</i>         | 26  | LC | TB  |
| <i>Centropus bengalensis</i>    | 6   | LC | RB  |
| <i>Ceryle rudis</i>             | 5   | LC | RB  |
| <i>Charadrius alexandrinus</i>  | 21  | LC | TB  |
| <i>Charadrius dubius</i>        | 21  | LC | TB  |
| <i>Charadrius leschenaultii</i> | 8   | LC | TB  |
| <i>Charadrius mongolus</i>      | 3   | LC | TB  |
| <i>Charadrius veredus</i>       | 5   | LC | TB  |
| <i>Chlidonias hybrida</i>       | 10  | LC | TB  |

|                                      |     |    |     |
|--------------------------------------|-----|----|-----|
| <i>Chlidonias leucopterus</i>        | 5   | LC | WMB |
| <i>Chloris sinica</i>                | 157 | LC | RB  |
| <i>Chroicocephalus ridibundus</i>    | 43  | LC | WMB |
| <i>Circus cyaneus</i>                | 2   | LC | WMB |
| <i>Circus melanoleucos</i>           | 1   | LC | WMB |
| <i>Circus spilonotus</i>             | 1   | LC | WMB |
| <i>Cisticola juncidis</i>            | 20  | LC | RB  |
| <i>Clamator coromandus</i>           | 7   | LC | RB  |
| <i>Coccothraustes coccothraustes</i> | 20  | LC | WMB |
| <i>Copsychus saularis</i>            | 479 | LC | RB  |
| <i>Corvus corone</i>                 | 1   | LC | WMB |
| <i>Corvus frugilegus</i>             | 8   | LC | RB  |
| <i>Corvus macrorhynchos</i>          | 1   | LC | RB  |
| <i>Coturnix japonica</i>             | 2   | NT | WMB |
| <i>Cuculus canorus</i>               | 21  | LC | SMB |
| <i>Cuculus micropterus</i>           | 58  | LC | SMB |
| <i>Cuculus poliocephalus</i>         | 3   | LC | SMB |
| <i>Cuculus saturatus</i>             | 1   | LC | SMB |
| <i>Culicicapa ceylonensis</i>        | 10  | LC | SMB |
| <i>Cyanopica cyanus</i>              | 388 | LC | RB  |
| <i>Cyanoptila cyanomelana</i>        | 42  | LC | TB  |
| <i>Cygnus columbianus</i>            | 1   | LC | WMB |
| <i>Cygnus cygnus</i>                 | 1   | LC | WMB |
| <i>Cygnus olor</i>                   | 1   | LC | TB  |
| <i>Delichon dasypus</i>              | 7   | LC | TB  |
| <i>Dendrocitta formosae</i>          | 4   | LC | RB  |
| <i>Dendrocopos major</i>             | 23  | LC | RB  |
| <i>Dendronanthus indicus</i>         | 6   | LC | TB  |
| <i>Dicrurus hottentottus</i>         | 3   | LC | SMB |
| <i>Dicrurus leucophaeus</i>          | 6   | LC | SMB |
| <i>Dicrurus macrocercus</i>          | 17  | LC | SMB |
| <i>Egretta eulophotes</i>            | 5   | VU | SMB |
| <i>Egretta garzetta</i>              | 432 | LC | SMB |
| <i>Elanus caeruleus</i>              | 3   | LC | RB  |
| <i>Emberiza chrysophrys</i>          | 37  | LC | TB  |
| <i>Emberiza cioides</i>              | 1   | LC | RB  |
| <i>Emberiza elegans</i>              | 130 | LC | WMB |
| <i>Emberiza fucata</i>               | 5   | LC | TB  |
| <i>Emberiza pallasi</i>              | 16  | LC | TB  |
| <i>Emberiza pusilla</i>              | 17  | LC | WMB |
| <i>Emberiza rustica</i>              | 26  | VU | WMB |
| <i>Emberiza rutila</i>               | 7   | LC | TB  |
| <i>Emberiza spodocephala</i>         | 250 | LC | WMB |
| <i>Emberiza tristrami</i>            | 113 | LC | WMB |

|                                 |     |    |     |
|---------------------------------|-----|----|-----|
| <i>Emberiza yessoensis</i>      | 2   | NT | WMB |
| <i>Eophona personata</i>        | 43  | LC | WMB |
| <i>Eudynamys scolopaceus</i>    | 13  | LC | SMB |
| <i>Eumyias thalassinus</i>      | 17  | LC | SMB |
| <i>Eurystomus orientalis</i>    | 31  | LC | TB  |
| <i>Falco amurensis</i>          | 5   | LC | WMB |
| <i>Falco columbarius</i>        | 1   | LC | WMB |
| <i>Falco peregrinus</i>         | 53  | LC | WMB |
| <i>Falco subbuteo</i>           | 8   | LC | SMB |
| <i>Falco tinnunculus</i>        | 76  | LC | WMB |
| <i>Ficedula albicilla</i>       | 18  | LC | TB  |
| <i>Ficedula mugimaki</i>        | 77  | LC | TB  |
| <i>Ficedula narcissina</i>      | 27  | LC | TB  |
| <i>Ficedula zanthopygia</i>     | 30  | LC | SMB |
| <i>Fringilla montifringilla</i> | 126 | LC | WMB |
| <i>Fulica atra</i>              | 202 | LC | WMB |
| <i>Gallinago gallinago</i>      | 30  | LC | WMB |
| <i>Gallinago megala</i>         | 2   | LC | TB  |
| <i>Gallinago stenura</i>        | 5   | LC | TB  |
| <i>Gallinula chloropus</i>      | 210 | LC | RB  |
| <i>Gavia arctica</i>            | 15  | LC | WMB |
| <i>Gavia stellata</i>           | 6   | LC | WMB |
| <i>Gelochelidon nilotica</i>    | 2   | LC | RB  |
| <i>Geokichla sibirica</i>       | 10  | LC | TB  |
| <i>Glareola maldivarum</i>      | 5   | LC | TB  |
| <i>Gracupica nigricollis</i>    | 67  | LC | RB  |
| <i>Grus grus</i>                | 1   | LC | WMB |
| <i>Halcyon pileata</i>          | 3   | LC | SMB |
| <i>Haliaeetus albicilla</i>     | 1   | LC | WMB |
| <i>Helopsaltes ochotensis</i>   | 3   | LC | TB  |
| <i>Helopsaltes pryeri</i>       | 4   | NT | WMB |
| <i>Hemixos castanonotus</i>     | 5   | LC | RB  |
| <i>Hierococyx hyperythrus</i>   | 3   | LC | WMB |
| <i>Himantopus himantopus</i>    | 12  | LC | TB  |
| <i>Hirundapus caudacutus</i>    | 1   | LC | TB  |
| <i>Hirundo rustica</i>          | 239 | LC | SMB |
| <i>Horornis canturians</i>      | 36  | LC | SMB |
| <i>Horornis fortipes</i>        | 10  | LC | RB  |
| <i>Hydrophasianus chirurgus</i> | 6   | LC | SMB |
| <i>Hydroprogne caspia</i>       | 3   | LC | SMB |
| <i>Hypothymis azurea</i>        | 3   | LC | RB  |
| <i>Hypsipetes amaurotis</i>     | 7   | LC | TB  |
| <i>Hypsipetes leucocephalus</i> | 9   | LC | SMB |
| <i>Ichthyaetus ichthyaetus</i>  | 6   | LC | TB  |

|                                  |     |    |     |
|----------------------------------|-----|----|-----|
| <i>Ixobrychus cinnamomeus</i>    | 2   | LC | SMB |
| <i>Ixobrychus eurhythmus</i>     | 1   | LC | SMB |
| <i>Ixobrychus flavicollis</i>    | 3   | LC | SMB |
| <i>Ixobrychus sinensis</i>       | 39  | LC | SMB |
| <i>Jynx torquilla</i>            | 5   | LC | WMB |
| <i>Lalage melaschistos</i>       | 9   | LC | SMB |
| <i>Lanius bucephalus</i>         | 8   | LC | WMB |
| <i>Lanius cristatus</i>          | 48  | LC | SMB |
| <i>Lanius sphenocercus</i>       | 5   | LC | WMB |
| <i>Lanius tigrinus</i>           | 12  | LC | SMB |
| <i>Larus canus</i>               | 28  | LC | WMB |
| <i>Larus crassirostris</i>       | 20  | LC | WMB |
| <i>Larus fuscus</i>              | 41  | LC | WMB |
| <i>Larus glaucescens</i>         | 7   | LC | WMB |
| <i>Larus schistisagus</i>        | 16  | LC | WMB |
| <i>Larus vegae</i>               | 108 | /  | WMB |
| <i>Larvivora akahige</i>         | 2   | LC | TB  |
| <i>Larvivora cyane</i>           | 10  | LC | TB  |
| <i>Larvivora sibilans</i>        | 27  | LC | TB  |
| <i>Leucogeranus leucogeranus</i> | 1   | CR | WMB |
| <i>Limnodromus scolopaceus</i>   | 1   | LC | TB  |
| <i>Limosa lapponica</i>          | 6   | NT | TB  |
| <i>Limosa limosa</i>             | 6   | NT | TB  |
| <i>Locustella lanceolata</i>     | 3   | LC | TB  |
| <i>Lonchura punctulata</i>       | 42  | LC | RB  |
| <i>Lonchura striata</i>          | 145 | LC | RB  |
| <i>Luscinia svecica</i>          | 11  | LC | TB  |
| <i>Macropygia unchall</i>        | 13  | LC | RB  |
| <i>Mareca falcata</i>            | 27  | NT | WMB |
| <i>Mareca penelope</i>           | 7   | LC | WMB |
| <i>Mareca strepera</i>           | 51  | LC | WMB |
| <i>Mergellus albellus</i>        | 2   | LC | WMB |
| <i>Mergus merganser</i>          | 1   | LC | WMB |
| <i>Milvus migrans</i>            | 6   | LC | RB  |
| <i>Monticola gularis</i>         | 7   | LC | TB  |
| <i>Monticola solitarius</i>      | 5   | LC | RB  |
| <i>Motacilla alba</i>            | 765 | LC | RB  |
| <i>Motacilla cinerea</i>         | 73  | LC | TB  |
| <i>Motacilla citreola</i>        | 1   | LC | WMB |
| <i>Motacilla tschutschensis</i>  | 42  | LC | TB  |
| <i>Muscicapa dauurica</i>        | 76  | LC | TB  |
| <i>Muscicapa griseisticta</i>    | 40  | LC | TB  |
| <i>Muscicapa sibirica</i>        | 28  | LC | TB  |
| <i>Myophonus caeruleus</i>       | 2   | LC | SMB |

|                                   |      |    |     |
|-----------------------------------|------|----|-----|
| <i>Nettapus coromandelianus</i>   | 4    | LC | SMB |
| <i>Niltava davidi</i>             | 1    | LC | SMB |
| <i>Ninox japonica</i>             | 6    | LC | WMB |
| <i>Numenius arquata</i>           | 4    | NT | WMB |
| <i>Numenius madagascariensis</i>  | 5    | EN | TB  |
| <i>Numenius minutus</i>           | 3    | LC | TB  |
| <i>Numenius phaeopus</i>          | 7    | LC | TB  |
| <i>Nycticorax nycticorax</i>      | 893  | LC | RB  |
| <i>Onychoprion anaethetus</i>     | 1    | LC | SMB |
| <i>Oriolus chinensis</i>          | 26   | LC | SMB |
| <i>Pandion haliaetus</i>          | 7    | LC | RB  |
| <i>Paradoxornis heudei</i>        | 12   | NT | RB  |
| <i>Parus minor</i>                | 389  | /  | RB  |
| <i>Passer montanus</i>            | 1145 | LC | RB  |
| <i>Pelecanus crispus</i>          | 2    | NT | TB  |
| <i>Pericrocotus cantonensis</i>   | 8    | LC | SMB |
| <i>Pericrocotus divaricatus</i>   | 16   | LC | TB  |
| <i>Periparus ater</i>             | 6    | LC | RB  |
| <i>Pernis ptilorhynchus</i>       | 7    | LC | TB  |
| <i>Phalacrocorax carbo</i>        | 65   | LC | WMB |
| <i>Phalaropus lobatus</i>         | 5    | LC | TB  |
| <i>Phasianus colchicus</i>        | 36   | LC | RB  |
| <i>Phoenicurus aureus</i>         | 285  | LC | WMB |
| <i>Phylloscopus borealis</i>      | 44   | LC | TB  |
| <i>Phylloscopus castaniceps</i>   | 1    | LC | SMB |
| <i>Phylloscopus coronatus</i>     | 43   | LC | TB  |
| <i>Phylloscopus fuscatus</i>      | 18   | LC | WMB |
| <i>Phylloscopus inornatus</i>     | 135  | LC | WMB |
| <i>Phylloscopus plumbeitarsus</i> | 5    | LC | TB  |
| <i>Phylloscopus proregulus</i>    | 256  | LC | WMB |
| <i>Picumnus innominatus</i>       | 19   | LC | RB  |
| <i>Platalea leucorodia</i>        | 2    | LC | TB  |
| <i>Platalea minor</i>             | 3    | EN | TB  |
| <i>Plegadis falcinellus</i>       | 2    | LC | TB  |
| <i>Pluvialis fulva</i>            | 9    | LC | TB  |
| <i>Pluvialis squatarola</i>       | 2    | LC | TB  |
| <i>Podiceps auritus</i>           | 1    | VU | WMB |
| <i>Podiceps cristatus</i>         | 29   | LC | WMB |
| <i>Podiceps nigricollis</i>       | 2    | LC | WMB |
| <i>Poecile palustris</i>          | 3    | LC | RB  |
| <i>Prinia inornata</i>            | 61   | LC | RB  |
| <i>Pterorhinus perspicillatus</i> | 50   | LC | RB  |
| <i>Pycnonotus sinensis</i>        | 748  | LC | RB  |
| <i>Pycnonotus xanthorrhous</i>    | 1    | LC | RB  |

|                                   |      |    |     |
|-----------------------------------|------|----|-----|
| <i>Rallus indicus</i>             | 11   | LC | WMB |
| <i>Recurvirostra avosetta</i>     | 4    | LC | TB  |
| <i>Regulus regulus</i>            | 41   | LC | WMB |
| <i>Remiz consobrinus</i>          | 30   | LC | WMB |
| <i>Riparia diluta</i>             | 2    | LC | RB  |
| <i>Rostratula benghalensis</i>    | 2    | LC | RB  |
| <i>Saxicola stejnegeri</i>        | 18   | /  | WMB |
| <i>Scolopax rusticola</i>         | 26   | LC | WMB |
| <i>Sinosuthora webbiana</i>       | 215  | LC | RB  |
| <i>Sittiparus varius</i>          | 6    | LC | RB  |
| <i>Spatula clypeata</i>           | 8    | LC | WMB |
| <i>Spatula querquedula</i>        | 7    | LC | TB  |
| <i>Spilopelia chinensis</i>       | 817  | LC | RB  |
| <i>Spinus spinus</i>              | 134  | LC | WMB |
| <i>Spizixos semitorques</i>       | 21   | LC | RB  |
| <i>Spodiopsar cineraceus</i>      | 352  | LC | WMB |
| <i>Spodiopsar sericeus</i>        | 247  | LC | RB  |
| <i>Sterna hirundo</i>             | 20   | LC | TB  |
| <i>Sternula albifrons</i>         | 6    | LC | SMB |
| <i>Streptopelia orientalis</i>    | 175  | LC | RB  |
| <i>Streptopelia tranquebarica</i> | 15   | LC | RB  |
| <i>Sturnus vulgaris</i>           | 2    | LC | TB  |
| <i>Tachybaptus ruficollis</i>     | 199  | LC | RB  |
| <i>Tadorna ferruginea</i>         | 1    | LC | WMB |
| <i>Tadorna tadorna</i>            | 3    | LC | WMB |
| <i>Tarsiger cyanurus</i>          | 307  | LC | WMB |
| <i>Terpsiphone atrocaudata</i>    | 10   | NT | TB  |
| <i>Terpsiphone incei</i>          | 3    | LC | SMB |
| <i>Thalasseus bernsteini</i>      | 5    | CR | SMB |
| <i>Treron sieboldii</i>           | 4    | LC | TB  |
| <i>Tringa brevipes</i>            | 3    | NT | TB  |
| <i>Tringa erythropus</i>          | 6    | LC | TB  |
| <i>Tringa glareola</i>            | 14   | LC | TB  |
| <i>Tringa guttifer</i>            | 1    | EN | TB  |
| <i>Tringa nebularia</i>           | 12   | LC | WMB |
| <i>Tringa ochropus</i>            | 24   | LC | WMB |
| <i>Tringa stagnatilis</i>         | 9    | LC | TB  |
| <i>Tringa totanus</i>             | 8    | LC | TB  |
| <i>Troglodytes troglodytes</i>    | 2    | LC | RB  |
| <i>Turdus cardis</i>              | 25   | LC | TB  |
| <i>Turdus chrysolaus</i>          | 4    | LC | SMB |
| <i>Turdus eunomus</i>             | 136  | LC | WMB |
| <i>Turdus hortulorum</i>          | 175  | LC | WMB |
| <i>Turdus mandarinus</i>          | 1293 | LC | RB  |

|                                 |     |    |     |
|---------------------------------|-----|----|-----|
| <i>Turdus mupinensis</i>        | 2   | LC | RB  |
| <i>Turdus naumanni</i>          | 57  | LC | WMB |
| <i>Turdus obscurus</i>          | 51  | LC | TB  |
| <i>Turdus pallidus</i>          | 262 | LC | WMB |
| <i>Turdus ruficollis</i>        | 7   | LC | WMB |
| <i>Turnix tanki</i>             | 1   | LC | SMB |
| <i>Upupa epops</i>              | 125 | LC | RB  |
| <i>Urosphena squameiceps</i>    | 15  | LC | TB  |
| <i>Vanellus cinereus</i>        | 4   | LC | SMB |
| <i>Vanellus vanellus</i>        | 4   | NT | WMB |
| <i>Xenus cinereus</i>           | 8   | LC | TB  |
| <i>Yuhina torqueola</i>         | 1   | LC | RB  |
| <i>Yungipicus canicapillus</i>  | 6   | LC | RB  |
| <i>Zoothera aurea</i>           | 99  | LC | WMB |
| <i>Zosterops erythropleurus</i> | 5   | LC | TB  |
| <i>Zosterops japonicus</i>      | 8   | LC | SMB |

## Section 2: Authenticity verification of citizen science data through observational data

**Table S2**

Area and location information of 20 survey sites. The latitude and longitude information donates the coordinates of the central point of the site.

| Site ID | Site name                     | Area(hm <sup>2</sup> ) | Latitude  | Longitude  |
|---------|-------------------------------|------------------------|-----------|------------|
| S1      | Yangpu Park                   | 20.23                  | 31.282476 | 121.531938 |
| S2      | Peace Park                    | 16.07                  | 31.272752 | 121.498739 |
| S3      | Luxun Park                    | 22.74                  | 31.273735 | 121.479042 |
| S4      | Quyang Park                   | 6.50                   | 31.289065 | 121.482053 |
| S5      | Jingan Park                   | 2.75                   | 31.223870 | 121.442182 |
| S6      | Yanzhong Plaza                | 5.06                   | 31.227490 | 121.470490 |
| S7      | Gucheng park                  | 3.37                   | 31.230485 | 121.489350 |
| S8      | Xujiahui Park                 | 7.94                   | 31.199265 | 121.437869 |
| S9      | Fuxing Park                   | 7.32                   | 31.218942 | 121.464586 |
| S10     | Zhabei Park                   | 12.00                  | 31.272295 | 121.455310 |
| S11     | Binjiang Park                 | 10.10                  | 31.244795 | 121.497766 |
| S12     | Taipingqiao Park              | 2.09                   | 31.221378 | 121.472248 |
| S13     | Shanghai Cultural Square      | 9.88                   | 31.213912 | 121.458458 |
| S14     | Bright City Greenland         | 4.17                   | 31.246562 | 121.455960 |
| S15     | Renming Rd Greenland          | 1.42                   | 31.230780 | 121.484501 |
| S16     | Qinjian Chunyuan              | 5.41                   | 31.197335 | 121.489622 |
| S17     | Nanyuan Waterfront Green Park | 10.66                  | 31.193703 | 121.471115 |
| S18     | Huangpu Park                  | 1.97                   | 31.243866 | 121.486316 |
| S19     | Zhongshan East 2Rd Greenland  | 2.26                   | 31.230717 | 121.491275 |
| S20     | Nansuzhou Rd Greenland        | 3.39                   | 31.244422 | 121.484497 |



Bird data collected from field observations. \* represents citizen science data of bird species.

[illegible]

[illegible]

**Table S4**

Comparison between observational data and citizen science data. Species repetition rate refers to the ratio of the richness of species observed both in the field and through citizen science, to the total richness of species observed in the field and through citizen science in a given site.

| Site ID | Bird richness<br>(observational data) | Bird richness<br>(citizen science data) | Species repetition<br>rate |
|---------|---------------------------------------|-----------------------------------------|----------------------------|
| S1      | 9                                     | 8                                       | 0.70                       |
| S2      | 5                                     | 4                                       | 0.80                       |
| S3      | 16                                    | 18                                      | 0.70                       |
| S4      | 7                                     | 8                                       | 0.67                       |
| S5      | 8                                     | 8                                       | 1.00                       |
| S6      | 9                                     | 10                                      | 0.58                       |
| S7      | 15                                    | 23                                      | 0.65                       |
| S8      | 18                                    | 22                                      | 0.74                       |
| S9      | 12                                    | 15                                      | 0.80                       |
| S10     | 9                                     | 12                                      | 0.61                       |
| S11     | 17                                    | 17                                      | 0.74                       |
| S12     | 5                                     | 6                                       | 0.83                       |
| S13     | 8                                     | 8                                       | 0.78                       |
| S14     | 5                                     | 5                                       | 0.67                       |
| S15     | 9                                     | 8                                       | 0.70                       |
| S16     | 5                                     | 5                                       | 1.00                       |
| S17     | 12                                    | 13                                      | 0.67                       |
| S18     | 2                                     | 2                                       | 1.00                       |
| S19     | 3                                     | 3                                       | 1.00                       |
| S20     | 3                                     | 3                                       | 1.00                       |

## Reference

1. Belhaj, A.; Pallarés, S.; Bennis, N.; Chergui, B.; Sánchez-Fernández, D. Towards the identification of hotspots of freshwater biodiversity in North-Western Africa: A case study using species distribution models for water beetles in Morocco. *Global Ecology and Conservation* **2023**, *43*, doi:10.1016/j.gecco.2023.e02441.
2. Guangmei, Z. *A Checklist on the Classification and Distribution of the Birds of China (Third Edition)*; Science Press: Beijing, 2017.
